# Supplementary material for: Efficacy and Optimal Dose of Botulinum Toxin A in Post-Stroke Lower Extremity Spasticity: A Systematic Review and Meta-Analysis
Source: MDPI journal article supplement (doi:10.3390/toxins13060428), 2021-06-18
Supplement: s1 [file s1]

# Supplementary Materials: Biofilm-Forming Methicillin-Resistant *Staphylococcus aureus* Survive in Kupffer Cells and Exhibit High Virulence in Mice

Thanh-Nhan Doan, Mei-Ying Kuo and Li-Wei Chou

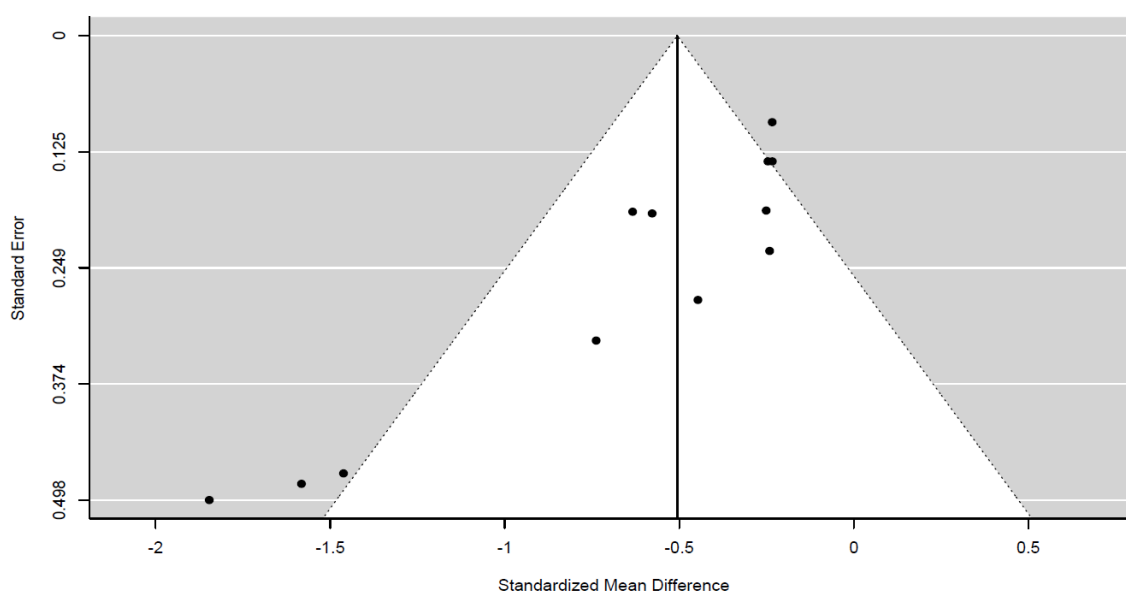

**Figure S1.** Funnel plot of muscle tone assessment at all time points.

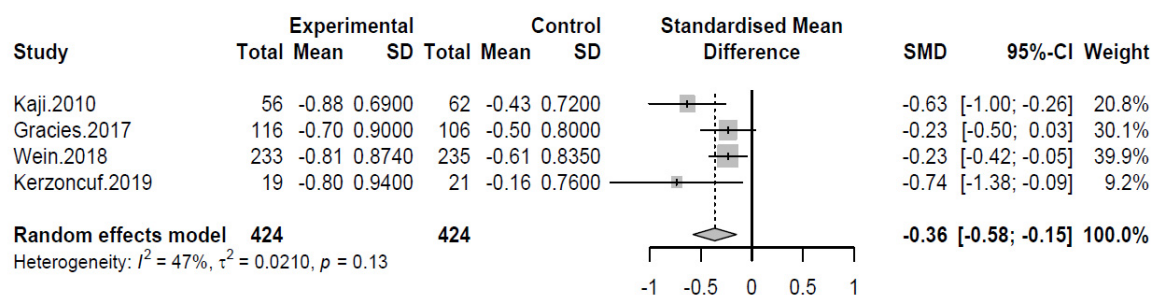

**Figure S2.** Forest plot of muscle tone assessments at week four after treatment (subgroup analysis).

**Table S1.** The quality of studies basing on the PEDro criteria.

| Study           | Specified eligibility criteria | Random allocation | Concealment of allocation | Comparable at baseline | Blinding of subjects | Blinding of therapist | Blinding of assessors | key outcome data for at least 85% of the subjects | Analysis by intention to treat | Between group analysis | Point estimate and variability | Total PEDro Score |
|-----------------|--------------------------------|-------------------|---------------------------|------------------------|----------------------|-----------------------|-----------------------|---------------------------------------------------|--------------------------------|------------------------|--------------------------------|-------------------|
| Burbaud.1996    | 1                              | 1                 | 1                         | 1                      | 1                    | 1                     | 1                     | 1                                                 | 1                              | 1                      | 1                              | 10                |
| Pittock.2003    | 1                              | 1                 | 1                         | 1                      | 1                    | 1                     | 1                     | 1                                                 | 0                              | 1                      | 1                              | 9                 |
| Mancini.2005    | 1                              | 1                 | 1                         | 1                      | 1                    | 1                     | 1                     | 1                                                 | 1                              | 1                      | 1                              | 10                |
| Kaji.2010       | 1                              | 1                 | 1                         | 1                      | 1                    | 1                     | 1                     | 1                                                 | 0                              | 1                      | 1                              | 9                 |
| Dunne.2012      | 1                              | 1                 | 1                         | 1                      | 1                    | 1                     | 1                     | 1                                                 | 0                              | 1                      | 1                              | 9                 |
| Pimentel.2014   | 1                              | 1                 | 1                         | 1                      | 1                    | 1                     | 1                     | 1                                                 | 0                              | 1                      | 1                              | 9                 |
| Fietzek.2014    | 1                              | 1                 | 1                         | 1                      | 1                    | 1                     | 1                     | 1                                                 | 0                              | 1                      | 1                              | 9                 |
| Tao.2015        | 1                              | 1                 | 1                         | 1                      | 1                    | 1                     | 1                     | 1                                                 | 1                              | 1                      | 1                              | 10                |
| Jiang Li. 2017  | 1                              | 1                 | 1                         | 1                      | 1                    | 1                     | 1                     | 1                                                 | 1                              | 1                      | 1                              | 10                |
| Gracies.2017    | 1                              | 1                 | 1                         | 1                      | 1                    | 1                     | 1                     | 1                                                 | 0                              | 1                      | 1                              | 9                 |
| Wein.2018       | 1                              | 1                 | 1                         | 1                      | 1                    | 1                     | 1                     | 1                                                 | 0                              | 1                      | 1                              | 9                 |
| Kerzoncuf. 2019 | 1                              | 1                 | 1                         | 1                      | 1                    | 1                     | 1                     | 1                                                 | 0                              | 1                      | 1                              | 9                 |
